# Supplementary material
Source: PubMed Central journal article supplement (PMC8173772)
Supplement: mmc1.pdf [file mmc1.pdf]

# Low Prognostic Value of Novel Nocturnal Metrics in Patients With OSA and High Cardiovascular Event Risk

## Post Hoc Analyses of the SAVE Study

*Dominik Linz, MD, PhD; Kelly A. Loffler, PhD; Prashanthan Sanders, PhD; Peter Catchside, PhD; Craig S. Anderson, MD, PhD; Danni Zheng, PhD; WeiWei Quan, MD, PhD; Mary Barnes, BSc (Hons), GDipMath; Susan Redline, MD, MPH; R. Doug McEvoy, MD; and Mathias Baumert, PhD; on behalf of the SAVE (Sleep Apnea Cardiovascular Endpoints) Investigators*

CHEST 2020; 158(6):2621-2631

*Online supplements are not copyedited prior to posting and the author(s) take full responsibility for the accuracy of all data.*

## **e-Appendix 1.**

### **SAVE STUDY GROUP AND SITE INVESTIGATORS**

#### **Executive Committee**

R. Doug McEvoy (Chair, Principal Investigator), Adelaide Institute for Sleep Health, Flinders University, Adelaide, Australia

Craig Anderson (Co-Chair, Co-Principal Investigator), The George Institute for Global Health, University of Sydney and Royal Prince Alfred Hospital, Sydney, Australia; The George Institute, China, Beijing, China

Ron Grunstein, Woolcock Institute of Medical Research, University of Sydney, Sydney, Australia

Jan Hedner, Department of Internal Medicine, Sahlgrenska University Hospital, Gothenburg, Sweden

Shaoguang Huang, Sleep Disorders Department, Ruijin Hospital, Shanghai Jiao Tong University, Shanghai, China

Geraldo Lorenzi-Filho, Heart Institute, Instituto do Coracao (InCor), University of Sao Paulo, Sao Paulo, Brazil

Bruce Neal, The George Institute for Global Health, University of Sydney, Sydney, Australia Lyle Palmer, School of Public Health, University of Adelaide, Adelaide, Australia

Susan Redline, Sleep Medicine - Harvard Medical School, Brigham and Women's Hospital and Beth Israel Deaconess Medical Center, Boston, United States

Jiguang Wang, Shanghai Institute for Hypertension, Ruijin Hospital and Shanghai Jiaotong University, Shanghai, China

Nanshan Zhong, The First Affiliated Hospital of Guangzhou Medical University, State Key Laboratory of Respiratory Disease, Guangzhou, China

#### **Operations Committee**

R. Doug McEvoy and Nick Antic, Adelaide Institute for Sleep Health, Flinders University, Adelaide, Australia; Craig Anderson, Emma Heeley, Ruth Freed, Tina Cheung, Natalie Espinosa, Sarah Leighton, Tara Sassé, Kim Bailey, Swamy Chintapatla, Al Freeman, Bryan Holder, Adele Hosseini, Michelle Leroux, Hugh Senior, Georgena Thomopoulos, Robyn Walsh and Zahara Wolfowicz, The George Institute, Australia

#### **Data Safety Monitoring Board**

Garry Jennings (Chair), National Heart Foundation of Australia, Melbourne, Australia Guy Marks, Woolcock Institute of Medical Research and University of New South Wales, Sydney, Australia

K.S. Lawrence Wong, Department of Medicine and Therapeutics, Chinese University of Hong Kong, Hong Kong, China

#### **Statisticians**

Laurent Billot, Qiang Li, Jayanthi Mysore, Sandrine Stepien and Stephane Heritier, The George Institute for Global Health, Australia Independent Sleep Expert (China)

Xiheng Guo, Beijing Chao Yang Hospital

#### **Endpoint Adjudicators**

Yongjun Cao, Second Affiliated Hospital of Soochow University, China

Carlos Campos, University of Sao Paulo, Instituto do Coracao (InCor), Sao Paulo, Brazil Candice Delcourt, The George Institute for Global Health, University of Sydney and Royal Prince Alfred Hospital, Sydney, Australia

Glaucylara Geovanini, Heart Institute, Instituto do Coracao (InCor), University of Sao Paulo, Sao Paulo, Brazil, Brigham and Women's Hospital, Boston, United States

Dennis Lau, Royal Adelaide Hospital and The University of Adelaide, Adelaide, Australia Alejandra Malavera, The George Institute for Global Health, Australia

Eng Lee Ooi, The University of Adelaide, The Queen Elizabeth Hospital, Lyell McEwin Hospital, Adelaide, Australia

Karla Santo, The George Institute for Global Health, Australia

Lili Song, Department of Neurology, 85 Hospital of People's Liberation Army, China Weiwei Quan, Cardiovascular Department Ruijin Hospital affiliated to Shanghai Jiaotong University School of Medicine, China

Min-Xia Wang, Royal Prince Alfred Hospital, University of Sydney, Australia Guojun Wu, Neurology Department, Hebei Province Yutian County Hospital, China

Jie Yang, Neurology Department, Nanjing First Hospital, Nanjing Medical University, Nanjing, China

Hooishan Yap, Flinders Medical Centre, Adelaide, Australia

Shihong Zhang, Neurology Department, West China Hospital, Sichuan University, China

### **International Coordinating Center (ICC) - The George Institute for Global Health, Australia**

*Project Management & Operations* – Emma Heeley (Study Director), Ruth Freed (Project Manager), Tina Cheung, Natalie Espinosa, Sarah Leighton, Tara Sassé, Kim Bailey, Swamy Chintapatla, Al Freeman, Bryan Holder, Adele Hosseini, Michelle Leroux, Hugh Senior, Georgena Thomopoulos, Robyn Walsh and Zahava Wolfowicz; *Data Management and Programming* – Manuela Armenis, Dominic Byrne, Paul Donnelly, Mirza Ahmad Baig and Nick Blacklock; *Contracts and Quality Assurance* – Helen Monaghan, Phillipa Smith, Parisa Glass, Magdalen Malone, Marna Van Zyl, Carolyn Rodger.

### **Strategic Study Management Center (SMC) – Adelaide Institute for Sleep Health, Adelaide, Australia**

*CoreLab* – Nick Antic, Laura Bandick, Michaela O'Keefe, Amanda McKenna, Jeremy Mercer, Mark Jurisevic, Samantha Mead; *Business and Finance* – Adrian Klauber, Leanne Cox.

### **Regional Coordinating Centers (RCCs)**

Australia (Adelaide Institute for Sleep Health) – Denzil Paul; Brazil (CR Pesquisa Clínica) – Sergio Tutya (Project Manager), Alessandro Betito, Diogo Moia; (Medicamenta MRS) – Joyce Marinho, Lara Cavalcante; China (The George Institute China incorporating George Clinical) – Shu Ying (Project Manager), Yuehan Zheng, Wei Wei, Hongyu Zhang, Jing Zhou, Haijing Jia, Meng Zhaung, Xiaoying Chen, Buliang Cui, Hua Deng, Xiaofen Ding, Nan Li, Hui Lin, Bochen Liu, Aiwu Song, Jian Sun, Sai Nan Wang, Feifei Zhao, Ying Zhuang; India (The George Institute India incorporating George Clinical) – Hemalata Boyini (Project Manager), Mallikarjuna Kunigari; Spain (Hospital Universitario de Guadalajara, supported by Spanish Respiratory Society (SEPAR) and the Fondo de Investigaciones Sanitarias (FIS)) – Olga Mediano (Project Manager), Esther Viejo, Nieves Mayoral, Javier Rubio.

### **SAVE Principal Investigators, Co-Investigators and Coordinators (according to country and center)**

**Australia** – *Sir Charles Gairdner Hospital*: S. Mukherjee, N. McArdle, B.M. Boeing, L. Palmer, D. Hillman, S.C. Rea; *Repatriation General Hospital*: R. D. McEvoy,

N. Antic, D. Paul, A. McKenna; *Royal Prince Alfred Hospital*: C.A. Anderson, C. Delcourt, C. Carcel, E. Ray, T. Paraskevaidis, S. Small, J. Levitt; *The Prince Charles Hospital*: J. Douglas, N. Dunn, D. Walters, L. Lan, J. Mikli, A. Wong, D. Curtin, J. Robinson; *Lyell McEwin Hospital*: M. Arstall, N. Lamberts, W. Jeffries; *Box Hill Hospital (ECRU)*: A.C. Young, I. Shinkarkasy, I. Shinkarkasy, F. Thien, D. O'Driscoll, A. Anniss, S. Dal Sasso; *Flinders Medical Centre*: D.P. Chew, F. Wollaston, K. Luscombe; *Alfred Hospital – CCRC Clinical Trial Centre*: M. Naughton, M. Hooy, S. Yorkston; *Royal Melbourne Hospital*: J. Goldin, J. Eritaia, E. White, A. Perkins; *University of Adelaide, Cardiovascular Centre*: P. Sanders, R. Sharp, K. Milburn; *Monash Medical Centre*: G. Hamilton, J. McKenzie; *Concord Hospital*: A. Corbett, R. Portley.

**Brazil** – *Instituto do Coração – INCOR*: G. Lorenzi-Filho, L. Drager, G.A. Souza,

D.B.C. Queiróz; *Pronto Socorro Cardiológico de Pernambuco*: R.P. Pedrosa, A. Medeiros, M. Carvalho, B. Thais Clementino; *Instituto Dante Pazzanese de Cardiologia*:

C. Amodeo, J. Silva, R. Depizzol, D. de Andrade, A. Bertolami, C. Gonzaga; *Instituto do Sono / AFIP*: L. Bittencourt, C. Ferreira, M. Bignotto; *Clínica de Pneumologia e Medicina do Sono (12)*: A. Petruco; *Hospital Universitário - Universidade de São Paulo*:

L.F. Drager; *Hospital Beneficência Portuguesa*: P.R. Genta; *Labsono - Diagnostico e Solucoes em Sono*: S. Fagondes, C. Perin.

**China** – *The First Affiliated Hospital of Guangzhou Medical University*: Y. Luo, Z. Qiu; *Guangdong General Hospital*: Q. Ou; *The First Affiliated Hospital of Nanjing Medical University*: X. Zhang; *The Second Affiliated Hospital of Soochow University*: R. Chen, Y. Sun, Y. He; *Fuwai Hospital*: Z. Liu, Z. Zhao, Q. Luo, Q. Zhao; *Xuzhou Central Hospital*: G. Chen; *Hejian Municipal People's Hospital*: B. Du, Y. Wang, Y. Guo, W. Dong, L. Wu, K. Yu, S. Wang, J. Shi; *Jiangsu Provincial Hospital of State Organ*: Z. Pan, Y. Dou, M. Zhu; *Beijing Shougang Hospital*: W. Gao; *The Second Affiliated Hospital of Hebei Medical University*: L. Tai, H. Wang; *Jiangsu Provincial Hospital Of State Organ*: G. Lu; *Baotou Central Hospital*: Y. Li, X. Li, R. Pan, H. Xue; *The Third Hospital of Hebei Medical University*: H. Wang; *Peking Union Medical College Hospital*: Y. Xiao, R. Huang; *The Second Affiliated Hospital of Guangzhou Medical College*: E. Xu, Q. Lin; *Guangxi People's Hospital of Guangxi Zhuang Autonomous Region*: J. Liu; *Zhongshan Hospital Fudan University*: S. Li, W. Li, X. Wu, J. Zhou, H. Jiang; *General Hospital of Tianjin Medical University*: B. Chen, Y. Ma; *Xinhua Hospital*: X. Guo, L. Ren, J. Sun, Y. Sun; *First Affiliated Hospital of Chinese Medical University*: W. Wang, H. Shen; *The First People's Hospital of Foshan*: G. Zhen; *Beijing Shijitan Hospital (Neurology Department)*: M. He, J. Liu; *The Second Hospital of Shanxi Medical University*: B. Wang, Z. Liu, H. Zhao, X. Gao,

Y. Fan; *The First Affiliated Hospital of Baotou Medical College*: L. Wu, X. Guo, J. Wu;

*Shanghai Huadong Hospital*: H. Zhu; *Beijing Haidian Hospital*: F. Yu, X. Meng,

W. Liu, X. Chen, X. Tang; *Shanghai Shidong Hospital*: X. Liu, M. Wang; *Shanghai Pulmonary Hospital*: Y. Liang; *The Fifth Affiliated Hospital, Sun Yat-Sen University*: Z. Li, X. Xu; *Beijing Tongren Hospital - Department of Neurology*: X. Zhang; *Beijing Shijitan Hospital (Sleep Monitoring Centre)*: L. Pan, X. Ma; *Zhejiang Hospital*: G. Qin; *The First Affiliated Hospital of Shanxi Medical University*: S. Ren; *No. 260 PLA Hospital of China*: S. Tian, J. Zhang; *Beijing Friendship Hospital, Capital Medical University*: K. Chen; *Beijing Police Hospital*: G. Xiao; *Ji Shui Tan Hospital (Cardiology Department)*: X. Zhao, Z. Ma; *Sino-Japan Friendship Hospital*: J. Lin, Y. Li; *Shanghai Ruijin Hospital*: M. Li; *Zengcheng People's Hospital*: R. Zou, H. Zhang, J. Guo; *The First People's Hospital of Changzhou*: C. Li, W. Peng; *301 Hospital Cardiology Department*: L. Gai; *Nanjing Jiangning Hospital*: X. Zhang; *The First People's Hospital of Wujiang*: Q. Wu, X. Lu; *Peking University First Hospital*: Y. Huang; *Tai Yuan City Centre Hospital*: P. Wang; *Beijing Tongren Hospital*: L. Li.

**India** - *All India Institute of Medical Sciences (AIIMS)*: M. Tripathi, P. Madakasira, S. Sharma, R. Verma; *BYL Nair Hospital*: J.M. Joshi, V. Karkhanis, S. Jaguste, M. Shah, S. Kalamkar, S. Kulkarni; *Christian Medical College Hospital, Ludhiana*: J.D. Pandian, N. Akhtar, D. Sharma; *Global Hospital*: M. Samiuddin; *Vijaya Health Center*: S. Kumar, M. Esunathan; *PSG Hospital*: R.M.P.L. Ramanathan, C. Subramaniamim, F. V. Jeyanthi; *King Edward Memorial (KEM) Hospital, Mumbai*: P. Kerkar, C. Lanjewar, R. Sharma, L. Desai; *Mediciti Hospital*: A. Bordoloi, N.C.R. Podduturi, S.R. Savusani; *Chest Clinic, Sri Ramakrishna Medical Centre*: M.K. Thekkinkattil, S. Muthuvairu.

**New Zealand** – *Christchurch Hospital*: M.C. Hlavac, M.J. Epton, M.K. Storer,

J.M. Cook; *Dunedin Hospital*: B. Brockway, J. Cowan, D.R. Taylor, E. Cox, R. Palmay; *Hutt Valley District Health Board*: K. Ferrier, J. Dewar, R. Kleintjes, J. Kovacs, A. Campbell, A. Neill; *Waikato Hospital*: C.L. Chang, C. Tuffery, S. Hopping, J. McLachlan; *Tauranga Hospital*: A.N. Graham, M.E. Molloy.

**Spain** – *Hospital Universitario de Guadalajara*: O. Mediano, M.I. Valiente-Díaz, N. Mayoral, J. Rubio, M.E. Viejo-Ayuso, J.M. Román-Sánchez, C. Rodriguez-García, J. Balaguer; *Hospital Sabadell Corporació Parc Tauli*: M.J. Masdeu, M. Piñar, L. Vigil, D. Gonzalez, G. Sansa, D. Canovas; *Hospital Doce de Octubre*: M.J. Diaz de Atauri, T. Diaz-Cambriles, P.D. Benavides-Manas, A. Hernando-Sanz, A. Candel-Pizarro, R. Chorro- Fito, E.M. Arias, J. Munoz Mendez; *Hospital Arnau de Vilanova*: F. Barbé Illa, S. Gomez Falguera, O. Minguez, L. Pascual; *Hospital Txagorritxu*: J. Durán, C. Egea Santaolalla.

**United States** – *Mayo Clinic*: S. Caples, N. Slocumb

**e-Table 1:** SAVE sites and ethics approval details

| Site Name                                | Country     | IRB/EC Name                                                                                              | Project Approval Number/Application Number |
|------------------------------------------|-------------|----------------------------------------------------------------------------------------------------------|--------------------------------------------|
| LYELL MCEWIN HOSPITAL                    | Australia   | Central Northern Adelaide Health Service, Ethics of Human Research Committee (TQEH & LMH)                | 2008114                                    |
| FLINDERS MEDICAL CENTRE                  | Australia   | Southern Adelaide Clinical Human Research Ethics Committee                                               | 200.08                                     |
| CAULFIELD CLINICAL TRIALS CENTRE         | Australia   | Alfred Hospital Ethics Committee                                                                         | 289/08                                     |
| ROYAL PRINCE ALFRED HOSPITAL             | Australia   | Sydney South West Area Health Service (SSWAHS) HREC - CRGH                                               | CH52/6/2008 - 08/CRGH/126                  |
| CONCORD REPATRIATION GENERAL HOSPITAL    | Australia   | Sydney South West Area Health Service (SSWAHS) HREC - CRGH                                               | CH52/6/2008 - 08/CRGH/126                  |
| ECRU (BOX HILL HOSPITAL)                 | Australia   | Eastern Health Human Research Ethics Committee                                                           | E27/0809                                   |
| ROYAL MELBOURNE HOSPITAL                 | Australia   | Melbourne Health HREC                                                                                    | 2008.207                                   |
| THE PRINCE CHARLES HOSPITAL              | Australia   | Human Research and Ethics Committee, The Prince Charles Hospital                                         | EC28123                                    |
| WASDRI (SIR CHARLES GAIRDNER HOSPITAL)   | Australia   | Sir Charles Gairdner Hospital Human Research Ethics Committee                                            | 2008-167                                   |
| REPATRIATION GENERAL HOSPITAL            | Australia   | Southern Adelaide Clinical Human Research Ethics Committee                                               | 200.08                                     |
| MONASH MEDICAL CENTRE                    | Australia   | Monash Health Human Research Ethics Committee                                                            | 09005A                                     |
| CARDIOVASCULAR CENTRE ADELAIDE           | Australia   | Royal Adelaide Hospital Research Ethics Committee                                                        | 101215a                                    |
|                                          |             |                                                                                                          |                                            |
| WAIKATO HOSPITAL                         | New Zealand | The Southern Health and Disability Ethics Committees                                                     | MEC/09/08/087                              |
| HUTT HOSPITAL                            | New Zealand | Multi-region Ethics Committee                                                                            | MEC/09/08/087                              |
| DUNEDIN HOSPITAL                         | New Zealand | Multi-region Ethics Committee                                                                            | MEC/09/08/087                              |
| CHRISTCHURCH HOSPITAL                    | New Zealand | Multi-region Ethics Committee                                                                            | MEC/09/08/087                              |
| TAURANGA HOSPITAL                        | New Zealand | Multi-region Ethics Committee                                                                            | MEC/09/08/087                              |
|                                          |             |                                                                                                          |                                            |
| LABSONO - DIAGNOSTICO E SOLUCOES EM SONO | Brazil      | HCPA – HOSPITAL DE CLÍNICAS DE PORTO ALEGRE, Comissão Científica e Comissão de Pesquisa e ética em saúde | 110266                                     |



|                                              |        |                                                                                       |                       |
|----------------------------------------------|--------|---------------------------------------------------------------------------------------|-----------------------|
| PRONTO SOCORRO CARDIOLOGICO DE PERNAMBUCO    | Brazil | COMITÊ DE ÉTICA EM PESQUISA EM SERES HUMANOS, COMPLEXO HOSPITALAR HUOC/PROCAPE        | 395092                |
| CLINICA DE PNEUMOLOGIA E MEDICINA DO SONO    | Brazil | COMITÊ PERMANENTE DE ÉTICA EM PESQUISA ENVOLVENDO SERES HUMANOS                       | 0238/11               |
| HOSPITAL BENEFICENCIA PORTUGUESA             | Brazil | Beneficência Portuguesa de São Paulo COMITÊ DE ÉTICA EM PESQUISA                      | 729-11                |
| HOSPITAL UNIVERSITARIO - SAO PAULO           | Brazil | Research Ethics Committee of Hospital Universitário da USP                            | 1078/10               |
| INSTITUTO DANTE PAZZANESE DE CARDIOLOGIA     | Brazil | INSTITUTO DANTE PAZZANESE DE CARDIOLOGIA, Research Ethics Committee                   | 3997                  |
| INSTITUTO DO CORACAO (INCOR)                 | Brazil | HOSPITAL DAS CLÍNICAS DA FMUSP Comissão de Ética para Análise de Projetos de Pesquisa | 0666/10               |
| INSTITUTO DO SONO - AFIP                     | Brazil | Comitê de Ética em Pesquisa da Universidade Federal de São Paulo/ Hospital São Paulo  | CEP 0071/11           |
|                                              |        |                                                                                       |                       |
| 301 HOSPITAL - DEPARTMENT OF CARDIOLOGY      | China  | Ethics Committee of Shanghai Ruijin Hospital                                          | (2008) EC REVIEW (34) |
| BEIJING POLICE HOSPITAL                      | China  | Ethics Committee of Shanghai Ruijin Hospital                                          | (2008) EC REVIEW (34) |
| BEIJING SHIJITAN HOSPITAL - DEP OF NEUROLOGY | China  | Ethics Committee of Shanghai Ruijin Hospital                                          | (2008) EC REVIEW (34) |
| INNER MONGOLIA BATOU CITY CENTRAL HOSPITAL   | China  | Ethics Committee of Shanghai Ruijin Hospital                                          | (2008) EC REVIEW (34) |
| FIRST AFFILIATED HOSPITAL OF CHINESE MED UNI | China  | Ethics Committee of First Affiliated Hospital of Chinese Medical University           | EC [2008]74           |
| FUWAI HOSPITAL                               | China  | Ethics Committee of Fuwai Hospital                                                    | 2008-157              |
| GENERAL HOSPITAL OF TIANJIN MEDICAL UNI      | China  | Ethics Committee of Shanghai Ruijin Hospital                                          | (2008) EC REVIEW (34) |
| GUANGDONG PROVINCIAL PEOPLES HOSPITAL        | China  | Ethics Committee of Guangdong Provincial People's Hospital                            | Yue Yi EC [2008]65-1  |
| JI SHUI TAN HOSPITAL                         | China  | Ethics Committee of Ji Shui Tan Hospital                                              | 201110-04             |
| JIANGSU PROVINCIAL HOSPITAL OF STATE ORGAN   | China  | Ethics Committee of Shanghai Ruijin Hospital                                          | (2008) EC REVIEW (34) |
| PEKING UNION MEDICAL COLLEGE HOSPITAL - RESP | China  | Ethics Committee of Peking Union Medical College Hospital                             | SAVE                  |
| PEKING UNIVERSITY FIRST HOSPITAL             | China  | Ethics Committee of Peking University First Hospital                                  | [2009]187             |
| SHANGHAI HUADONG HOSPITAL                    | China  | Ethics Committee of Shanghai Ruijin Hospital                                          | (2008) EC REVIEW (34) |
| SHANGHAI PULMONARY HOSPITAL                  | China  | Ethics Committee of Shanghai Ruijin Hospital                                          | (2008) EC REVIEW (34) |





|                                             |       |                                                                                 |                       |
|---------------------------------------------|-------|---------------------------------------------------------------------------------|-----------------------|
| SHANGHAI RUIJIN HOSPITAL                    | China | Ethics Committee of Shanghai Ruijin Hospital                                    | (2008) EC REVIEW (34) |
| SINO-JAPAN FRIENDSHIP HOSPITAL              | China | Ethics Committee of Sino-Japan Friendship Hospital                              | 2009-29               |
| THE FIFTH AFFILIATED HOSPITAL               | China | Ethics Committee of Shanghai Ruijin Hospital                                    | (2008) EC REVIEW (34) |
| THE FIRST AFFILIATED HOSPITAL OF GUANGZHOU  | China | Ethics Committee of The First Affiliated Hospital of Guangzhou Medical College  | (2008) EC REVIEW (34) |
| THE FIRST AFFILIATED HOSPITAL OF NANJING    | China | Ethics Committee of The First Affiliated Hospital of Nanjing Medical University | (2008) EC (031316)    |
| THE FIRST PEOPLES HOSPITAL OF CHANGZHOU     | China | Ethics Committee of The First People's Hospital of Changzhou                    | [2009]01              |
| THE SECOND AFFILIATED HOSPITAL OF GUANGZHOU | China | Ethics Committee of Shanghai Ruijin Hospital                                    | (2008) EC REVIEW (34) |
| THE THIRD HOSPITAL OF HEBEI MEDICAL UNI     | China | Ethics Committee of Shanghai Ruijin Hospital                                    | (2008) EC REVIEW (34) |
| XINHUA HOSPITAL                             | China | Ethics Committee of Shanghai Ruijin Hospital                                    | (2008) EC REVIEW (34) |
| ZHEJIANG HOSPITAL                           | China | Ethics Committee of Shanghai Ruijin Hospital                                    | (2008) EC REVIEW (34) |
| ZHONGSHAN HOSPITAL FUDAN UNIVERSITY         | China | Ethics Committee of Shanghai Ruijin Hospital                                    | (2008) EC REVIEW (34) |
| BEIJING HAIDIAN HOSPITAL                    | China | Ethics Committee of Shanghai Ruijin Hospital                                    | (2008) EC REVIEW (34) |
| BEIJING SHIJITAN HOSPITAL - SLEEP CENTER    | China | Ethics Committee of Shanghai Ruijin Hospital                                    | (2008) EC REVIEW (34) |
| BEIJING TONGREN HOSPITAL - DEP OF NEUROLOGY | China | Ethics Committee of Shanghai Ruijin Hospital                                    | (2008) EC REVIEW (34) |
| NANJING JIANGNING HOSPITAL                  | China | Ethics Committee of Shanghai Ruijin Hospital                                    | (2008) EC REVIEW (34) |
| THE SECOND AFFILIATED HOSP OF SOOCHOW UNI   | China | Ethics Committee of Shanghai Ruijin Hospital                                    | (2008) EC REVIEW (34) |
| THE FIRST HOSPITAL OF SHANXI MEDICAL UNI    | China | Ethics Committee of The First Affiliated Hospital of Shanxi Medical University  | SAVE                  |
| THE PEOPLES HOSP GUANGXI ZHUANG AUTONOM REG | China | Ethics Committee of Shanghai Ruijin Hospital                                    | (2008) EC REVIEW (34) |
| THE FIRST PEOPLES HOSPITAL OF FOSHAN        | China | Ethics Committee of Shanghai Ruijin Hospital                                    | (2008) EC REVIEW (34) |

Online supplements are not copyedited prior to posting and the author(s) take full responsibility for the accuracy of all data.



|                                              |       |                                                                                                    |                        |
|----------------------------------------------|-------|----------------------------------------------------------------------------------------------------|------------------------|
| THE SECOND HOSPITAL OF SHANXI MEDICAL UNI    | China | Ethics Committee of Shanghai Ruijin Hospital                                                       | (2008) EC REVIEW (34)  |
| THE 1ST AFFILIATED HOSP OF BAOTOU MED COLL   | China | Ethics Committee of Shanghai Ruijin Hospital                                                       | (2008) EC REVIEW (34)  |
| THE SECOND AFF HOSP OF HEBEI MEDICAL UNI     | China | Ethics Committee of Shanghai Ruijin Hospital                                                       | (2008) EC REVIEW (34)  |
| HEJIAN MUNICIPAL PEOPLES HOSPITAL            | China | Ethics Committee of Shanghai Ruijin Hospital                                                       | (2008) EC REVIEW (34)  |
| SHANGHAI SHIDONG HOSPITAL                    | China | Ethics Committee of Shanghai Ruijin Hospital                                                       | (2008) EC REVIEW (34)  |
| XUZHOU CENTRAL HOSPITAL                      | China | Ethics Committee of Shanghai Ruijin Hospital                                                       | (2008) EC REVIEW (34)  |
| PEKING UNIVERSITY SHOUGANG HOSPITAL          | China | Ethics Committee of Shanghai Ruijin Hospital                                                       | (2008) EC REVIEW (34)  |
| JIANGSU PROVINCIAL HOPITAL OF STATE ORGAN    | China | Ethics Committee of Shanghai Ruijin Hospital                                                       | (2008) EC REVIEW (34)  |
| ZENGCHENG PEOPLES HOSPITAL                   | China | Ethics Committee of Shanghai Ruijin Hospital                                                       | (2008) EC REVIEW (34)  |
| NO. 260 PLA HOSPITAL OF CHINA                | China | Ethics Committee of Shanghai Ruijin Hospital                                                       | (2008) EC REVIEW (34)  |
| THE FIRST PEOPLES HOSPITAL OF WUJIANG        | China | Ethics Committee of Shanghai Ruijin Hospital                                                       | (2008) EC REVIEW (34)  |
| BEIJING FRIENDSHIP HOSPITAL, CAPTIAL MED UNI | China | Ethics Committee of Beijing Friendship Hospital, Capital Medical University                        | (2011) EC REVIEW (053) |
| BEIJING TONGREN HOSPITAL, CARDIOLOGY DEPT.   | China | Ethics Committee of Shanghai Ruijin Hospital                                                       | (2008) EC REVIEW (34)  |
|                                              |       |                                                                                                    |                        |
| ALL INDIA INSTITUTE OF MEDICAL SCIENCES      | India | Institution Ethics Committee All India Institute of Medical Sciences                               | IEC/OP-01/05.12.2011   |
| CHRISTIAN MEDICAL COLLEGE AND HOSPITAL       | India | Institutional Ethics Committee Christian Medical College & Hospital, Ludhiana                      | None stated (SAVE)     |
| KING EDVERD MEMORIAL HOSPITAL (KEM)          | India | Ethics Committee for Research on Human Subjects (ECRHS), Seth G.S Medical College & K.E.M Hospital | EC/PHARMA-4/2010       |
| B Y L NAIR HOSPITAL                          | India | Institutional Ethics Committee, B.Y.L NAIR CH. Hospital & T.N. MEDICAL COLLEGE                     | None stated (SAVE)     |
| GLOBAL HOSPITAL                              | India | Institutional Ethics Committee, Global Hospitals                                                   | None stated (SAVE)     |
| MEDICIT HOSPITAL                             | India | Mediciti Ethics Committee                                                                          | None stated (SAVE)     |





|                                               |       |                                                                              |                    |
|-----------------------------------------------|-------|------------------------------------------------------------------------------|--------------------|
| VIJAYA HEALTH CENTER                          | India | The Ethics Committee Vinjaya Health Centre                                   | None stated (SAVE) |
| CHEST CLINIC, SRI RAMA KRISHNA MEDICAL CENTRE | India | Institutional Ethics Committee, Ramakrishna Hospital                         | None stated (SAVE) |
| P S G HOSPITAL                                | India | PSG Institute of Medical Sciences & Research, Institutional Ethics Committee | None stated (SAVE) |
|                                               |       |                                                                              |                    |
| HOSPITAL TXAGORRITXU                          | Spain | EUSKADI 'S CLINICAL RESEARCH OF ETHICS COMMITTEE                             | 2011116            |
| HOSPITAL PARC TAULI                           | Spain | Ethics Committee of Corporacio Sanitaria Parc Tauli                          | None stated (SAVE) |
| HOSPITAL DOCE DE OCTUBRE, MADRID              | Spain | Ethics Committee 12 Octubre Hospital                                         | 11/187             |
| HOSPITAL CENTRAL DE ASTURIAS                  | Spain | Comite Etico de Investigacion Clinica de Asturias                            | SAVE               |
| HOSPITAL SANTA MARIA                          | Spain | Clinical Research Ethics Committee, Arnau de Vilanova University Hospital    | None stated (SAVE) |
| HOSPITAL UNIVERSITARIO DE GUADALAJARA         | Spain | Clinical Research Ethics Committee, Guadalajara University Hospital          | None stated (SAVE) |
|                                               |       |                                                                              |                    |
| MAYO CLINIC                                   | USA   | Mayo Clinic Institutional Review Boards                                      | 11-002685          |

**e-Table 2:** Medical history and medication at baseline

|                                                   | CPAP<br>Count | Column N % | Usual Care<br>Count | Column N % | Total<br>Count | Column N % |
|---------------------------------------------------|---------------|------------|---------------------|------------|----------------|------------|
| Hypertension                                      | 1043          | 78.5%      | 1032                | 78.2%      | 2075           | 78.3%      |
| Diabetes mellitus                                 | 401           | 30.2%      | 387                 | 29.3%      | 788            | 29.8%      |
| Any heart disease                                 | 546           | 41.1%      | 523                 | 39.6%      | 1069           | 40.4%      |
| Myocardial infarction                             | 426           | 32.1%      | 458                 | 34.7%      | 884            | 33.4%      |
| Angina                                            | 497           | 37.4%      | 478                 | 36.2%      | 975            | 36.8%      |
| Heart failure                                     | 19            | 1.4%       | 29                  | 2.2%       | 48             | 1.8%       |
| Valvular heart disease                            | 20            | 1.5%       | 28                  | 2.1%       | 48             | 1.8%       |
| Percutaneous coronary revascularization (+-stent) | 444           | 33.4%      | 455                 | 34.5%      | 899            | 33.9%      |
| Coronary artery bypass graft                      | 158           | 11.9%      | 154                 | 11.7%      | 312            | 11.8%      |
| Stroke                                            | 582           | 43.8%      | 586                 | 44.4%      | 1168           | 44.1%      |
| Transient ischaemic attack                        | 134           | 10.1%      | 128                 | 9.7%       | 262            | 9.9%       |
| Carotid endarterectomy or percutaneous stent      | 10            | 0.8%       | 12                  | 0.9%       | 22             | 0.8%       |
| Intracerebral stent                               | 3             | 0.2%       | 2                   | 0.2%       | 5              | 0.2%       |
| Other form of cardiovascular disease              | 52            | 3.9%       | 64                  | 4.8%       | 116            | 4.4%       |
| Blood pressure lowering medication                | 1037          | 78.0%      | 1026                | 77.7%      | 2063           | 77.9%      |
| Multiple BP modifying medications                 | 668           | 50.3%      | 632                 | 47.9%      | 1300           | 49.1%      |
| Lipid lowering medication                         | 752           | 56.6%      | 788                 | 59.7%      | 1540           | 58.1%      |
| Multiple lipid modifying drugs                    | 77            | 5.8%       | 78                  | 5.9%       | 155            | 5.9%       |
| Oral anti-diabetic medication                     | 288           | 21.7%      | 288                 | 21.8%      | 576            | 21.7%      |
| Insulin                                           | 79            | 5.9%       | 81                  | 6.1%       | 160            | 6.0%       |
| Anti-platelet/ anti-thrombotic agents             | 994           | 74.8%      | 994                 | 75.3%      | 1988           | 75.0%      |
| Organic nitrates                                  | 218           | 16.4%      | 204                 | 15.5%      | 422            | 15.9%      |
| Other cardiac medications                         | 66            | 5.0%       | 54                  | 4.1%       | 120            | 4.5%       |
| Traditional Chinese medicines                     | 144           | 10.8%      | 128                 | 9.7%       | 272            | 10.3%      |
| Alimentary tract and metabolism medications       | 21            | 1.6%       | 27                  | 2.0%       | 48             | 1.8%       |

\*Note medical history information missing for 6 participants (3 in each treatment group)

**e-Table 3:** Characterization of sleep apnea metrics and patterns of nocturnal hypoxemia.

|                                                            | CPAP<br>Median (IQR) | Usual Care<br>Median (IQR) | Total<br>Median (IQR) |
|------------------------------------------------------------|----------------------|----------------------------|-----------------------|
| Apnoea-hypopnea index (AHI) [events/hour]                  | 25 (16 – 38)         | 25 (16 – 40)               | 25 (16 – 39)          |
| Epworth Sleepiness Score (ESS)                             | 7 (5 – 10)           | 7 (5 – 10)                 | 7 (5 – 10)            |
| Average nightly adherence of sham CPAP [hours/night]       | 5.1 (4.1 - 6.2)      | 5.1 (4.1 - 6.2)            | 5.1 (4.1 – 6.2)       |
| CPAP adherence over duration of trial [hours/night]        | 3.2 (1.2 - 5.0)      | -                          |                       |
| Patterns of nocturnal hypoxemia (custom MATLAB® algorithm) |                      |                            |                       |
| Oxygen desaturation index (ODI) [events/hour]              | 21.8 (14.2 – 34.9)   | 22.1 (14.5 – 36.3)         | 22.0 (14.3 – 35.6)    |
| T<90% (minutes)                                            | 25.8 (9.9 – 66.1)    | 24.8 (8.5 – 64.5)          | 25.4 (9.2 – 65.0)     |
| Mean SpO <sub>2</sub> [%]                                  | 93.6 (92.1 – 94.7)   | 93.7 (92.2 – 94.8)         | 93.6 (92.2 – 94.7)    |
| Baseline SpO <sub>2</sub> [%]                              | 95.1 (93.8 – 96.2)   | 95.2 (93.8 – 96.3)         | 95.2 (93.8 – 96.2)    |
| Desaturation SpO <sub>2</sub> [%]                          | 1.1 (0.7 – 1.9)      | 1.1 (0.7 – 2.0)            | 1.1 (0.7 – 1.9)       |
| Desaturation duration [s]                                  | 43.5 (37.0 – 49.5)   | 43.0 (37.0 – 49.0)         | 43.0 (37.0 - 49.0)    |
| Desaturation/resaturation time ratio                       | 1.8 (1.5 – 2.3)      | 1.8 (1.4 - 2.3)            | 1.8 (1.5 – 2.3)       |
| Desaturation average SpO <sub>2</sub> reduction [%]        | 3.4 (2.9 – 4.1)      | 3.4 (2.9 – 4.1)            | 3.4 (2.9 – 4.1)       |
| Desaturation nadir [%]                                     | 89.0 (88.0 – 91.0)   | 89.0 (88.0 – 91.0)         | 89.0 (88.0 – 91.0)    |

Oxygen desaturation index (ODI) as calculated by desaturation events identified by the custom algorithm, per hour of analysed recording time.

No significant differences between treatment groups.

**e-Table 4:** Multivariable Cox regression analysis for outcome components

|                                                    | Cardiovascular Death |              |       | Myocardial Infarction |                |       | Stroke |               |         | Heart Failure |              |         | Angina |              |         | Transient Ischaemic Event |               |       |
|----------------------------------------------------|----------------------|--------------|-------|-----------------------|----------------|-------|--------|---------------|---------|---------------|--------------|---------|--------|--------------|---------|---------------------------|---------------|-------|
|                                                    | HR                   | 95% CI       | Sig   | HR                    | 95% CI         | Sig   | HR     | 95% CI        | Sig     | HR            | 95% CI       | Sig     | HR     | 95% CI       | Sig     | HR                        | 95% CI        | Sig   |
| <b>Block 1</b>                                     |                      |              |       |                       |                |       |        |               |         |               |              |         |        |              |         |                           |               |       |
| Treatment allocation (CPAP vs Usual Care)          |                      |              | ns    |                       |                | ns    |        |               | ns      |               |              | ns      |        |              | ns      |                           |               | ns    |
| Smoking status (ref. never)                        |                      |              | ns    |                       |                | ns    |        |               | ns      |               |              | ns      |        |              | 0.010   |                           |               | ns    |
| Past                                               |                      |              | -     |                       |                | -     |        |               | -       |               |              | -       | 0.87   | 0.546, 1.382 | 0.539   |                           |               | -     |
| Current                                            |                      |              | -     |                       |                | -     |        |               | -       |               |              | -       | 1.42   | 0.911, 2.206 | 0.122   |                           |               | -     |
| Ethnicity, simplified (ref. Caucasian/European)    |                      |              | ns    |                       |                | 0.041 |        |               | 0.051   |               |              | ns      |        |              | <0.0001 |                           |               | 0.064 |
| Asian                                              |                      |              | -     | 0.58                  | 0.317, 1.073   | 0.083 | 1.83   | 0.998, 3.339  | 0.051   |               |              | -       | 2.64   | 1.714, 4.053 | <0.0001 | 0.32                      | 0.120, 0.831  | 0.020 |
| Other                                              |                      |              | -     | 1.45                  | 0.767, 2.746   | 0.252 | 0.77   | 0.251, 2.373  | 0.651   |               |              | -       | 0.98   | 0.500, 1.924 | 0.954   | 0.66                      | 0.138, 3.155  | 0.603 |
| Hypertension history                               |                      |              | ns    |                       |                | ns    |        |               | ns      |               |              | ns      |        |              | ns      |                           |               | ns    |
| Diabetes                                           |                      |              | ns    |                       |                | ns    | 1.95   | 1.367, 2.770  | <0.001  |               |              | ns      |        |              | ns      |                           |               | ns    |
| Cardiovascular disease history (ref. cardiac only) |                      |              | ns    |                       |                | 0.015 |        |               | <0.0001 |               |              | ns      |        |              | <0.0001 |                           |               | 0.049 |
| Cerebrovascular                                    |                      |              | -     | 0.69                  | 0.386, 1.246   | 0.221 | 3.42   | 2.125, 5.501  | <0.0001 |               |              | -       | 0.29   | 0.192, 0.426 | <0.0001 | 1.98                      | 0.731, 5.384  | 0.179 |
| Both                                               |                      |              | -     | 2.40                  | 1.122, 5.121   | 0.024 | 7.02   | 3.691, 13.345 | <0.0001 |               |              | -       | 2.15   | 1.379, 3.342 | 0.001   | 5.32                      | 1.386, 20.405 | 0.015 |
| Medications (count)                                | 1.28                 | 1.094, 1.495 | 0.002 | 1.12                  | 0.990, 1.257   | 0.072 |        |               | ns      | 1.45          | 1.232, 1.705 | <0.0001 | 1.12   | 1.033, 1.224 | 0.007   | 0.72                      | 0.538, 0.960  | 0.025 |
| Age (years)                                        |                      |              | ns    |                       |                | ns    |        |               | ns      | 1.13          | 1.062, 1.193 | <0.0001 |        |              | ns      |                           |               | ns    |
| Waist:hip ratio                                    |                      |              | ns    | 32.68                 | 3.423, 311.965 | 0.002 |        |               | ns      |               |              | ns      |        |              | ns      |                           |               | ns    |
| Oxygen Desaturation Index (events/hour, custom)    |                      |              | ns    |                       |                | ns    |        |               | ns      |               |              | ns      |        |              | ns      |                           |               | ns    |



| <b>Block 2</b>                                |      |                 |             |      |                 |       |      |                 |       |      |                 |       |      |                 |       |      |                 |       |
|-----------------------------------------------|------|-----------------|-------------|------|-----------------|-------|------|-----------------|-------|------|-----------------|-------|------|-----------------|-------|------|-----------------|-------|
| Pulse rate (mean)                             |      |                 | ns          |      |                 | ns    |      |                 | ns    | 1.04 | 1.002,<br>1.075 | 0.037 |      |                 | ns    |      | ns              |       |
| Pulse rate (standard deviation)               | 1.11 | 1.071,<br>1.156 | <0.00<br>01 |      |                 | ns    | 1.04 | 1.006,<br>1.074 | 0.022 |      |                 | ns    | 0.91 | 0.826,<br>0.999 | 0.048 |      | ns              |       |
| Desat/Resat time ratio                        |      |                 | ns          |      |                 | ns    |      |                 | ns    | 0.32 | 0.151,<br>0.688 | 0.003 |      |                 | ns    |      | ns              |       |
| Baseline SpO2 (%)                             | 1.18 | 0.976,<br>1.437 | 0.086       | 0.90 | 0.795,<br>1.016 | 0.089 |      |                 | ns    |      |                 | ns    | 0.92 | 0.843,<br>1.004 | 0.063 |      | ns              |       |
| Desaturation event average SpO2 reduction (%) | 0.58 | 0.391,<br>0.868 | 0.008       |      |                 | ns    |      |                 | ns    |      |                 | ns    |      |                 | ns    |      | ns              |       |
| Desaturation event duration (s)               | 1.04 | 1.006,<br>1.067 | 0.018       |      |                 | ns    |      |                 | ns    | 1.05 | 1.014,<br>1.079 | 0.005 |      |                 | ns    | 1.05 | 1.012,<br>1.087 | 0.010 |

ns indicates variables excluded from the backwards conditional stepwise multivariable Cox regression analysis as not significant. Variables were assessed for retention in each block as P(in) 0.05/P(out) 0.

**e-Table 5:** Heart failure outcome. The two block multivariable backwards stepwise multivariable Cox regression approach applied to the heart failure outcome only.

|                                         | <b>HR [95% CI]</b> | <b>HR, z-normalised value<br/>for scale variables<br/>[95% CI]</b> | <b>Sig.</b> |
|-----------------------------------------|--------------------|--------------------------------------------------------------------|-------------|
| Medications sum                         | 1.45 [1.23-1.71]   | 2.02 [1.48-2.75]                                                   | P<0.001     |
| Age (years)                             | 1.13 [1.06-1.19]   | 2.51 [1.60-3.94]                                                   | P<0.001     |
| Pulse mean [bpm]                        | 1.04 [1.00-1.08]   | 1.41 [1.02-1.96]                                                   | P=0.037     |
| Desaturation/resaturation<br>time ratio | 0.32 [0.15-0.69]   | 0.48 [0.29-0.78]                                                   | P=0.003     |
| Desaturation duration [s]               | 1.05 [1.01-1.08]   | 1.53 [1.14-2.05]                                                   | P=0.005     |

Regression formula for final model: 0.371\*medications sum + 0.118\*age at baseline (years) + 0.037\*mean pulse + (-1.131\*Desat/resat time ratio) + 0.045\*Desaturation duration

**e-Table 6:** Reanalysis of the heart failure outcome in a second two block backwards stepwise conditional analysis, in which the general cardiovascular disease history variable (coronary, cerebrovascular or both) in the first block was replaced with a categorical variable specific for history of heart failure.

|                                         | <b>HR [95% CI]</b> | <b>HR, z-normalised value<br/>for scale variables<br/>[95% CI]</b> | <b>Sig.</b> |
|-----------------------------------------|--------------------|--------------------------------------------------------------------|-------------|
| Diabetes                                | 2.30 [1.00-5.27]   |                                                                    | P=0.049     |
| Heart failure history                   | 4.38 [1.67-11.48]  |                                                                    | P=0.003     |
| Medications sum                         | 1.27 [1.04-1.55]   | 1.58 [1.08-2.31]                                                   | P=0.017     |
| Age (years)                             | 1.10 [1.04-1.16]   | 2.10 [1.35-3.27]                                                   | P=0.001     |
| Desaturation/resaturation<br>time ratio | 0.39 [0.19-0.83]   | 0.55 [0.33-0.89]                                                   | P=0.015     |
| Desaturation duration [s]               | 1.04 [1.01-1.08]   | 1.48 [1.09-2.00]                                                   | P=0.012     |

Regression formula for final model = 0.832\*1 (if diabetes, 0 if not) + 0.242\*medications sum + 0.095\*age at baseline + 1.477\*1 (if history of heart failure, 0 if not) + (-0.935\* desaturation/resaturation ratio) + 0.041\* desaturation duration.



**e-Figure 1.**

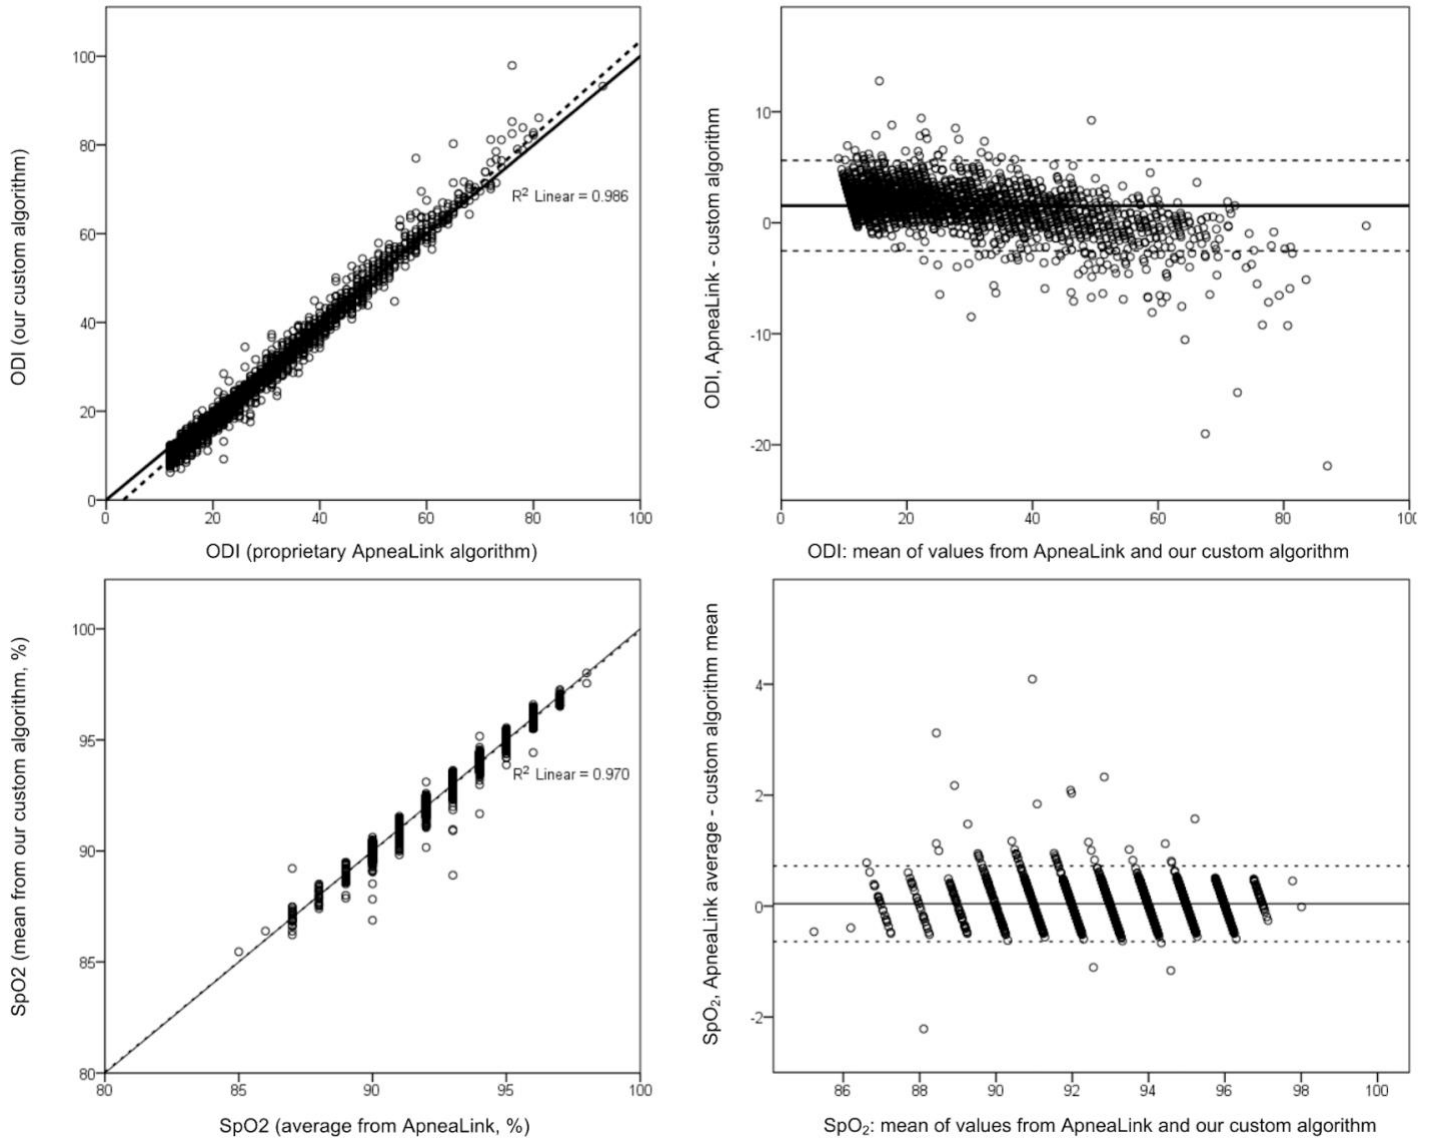

Direct comparison and Bland-Altman plots comparing oxygen desaturation index (ODI, events/hour) and mean SpO<sub>2</sub> (%) calculated by the ApneaLink® software and by the custom MATLAB® algorithm.

**e-Figure 2.**

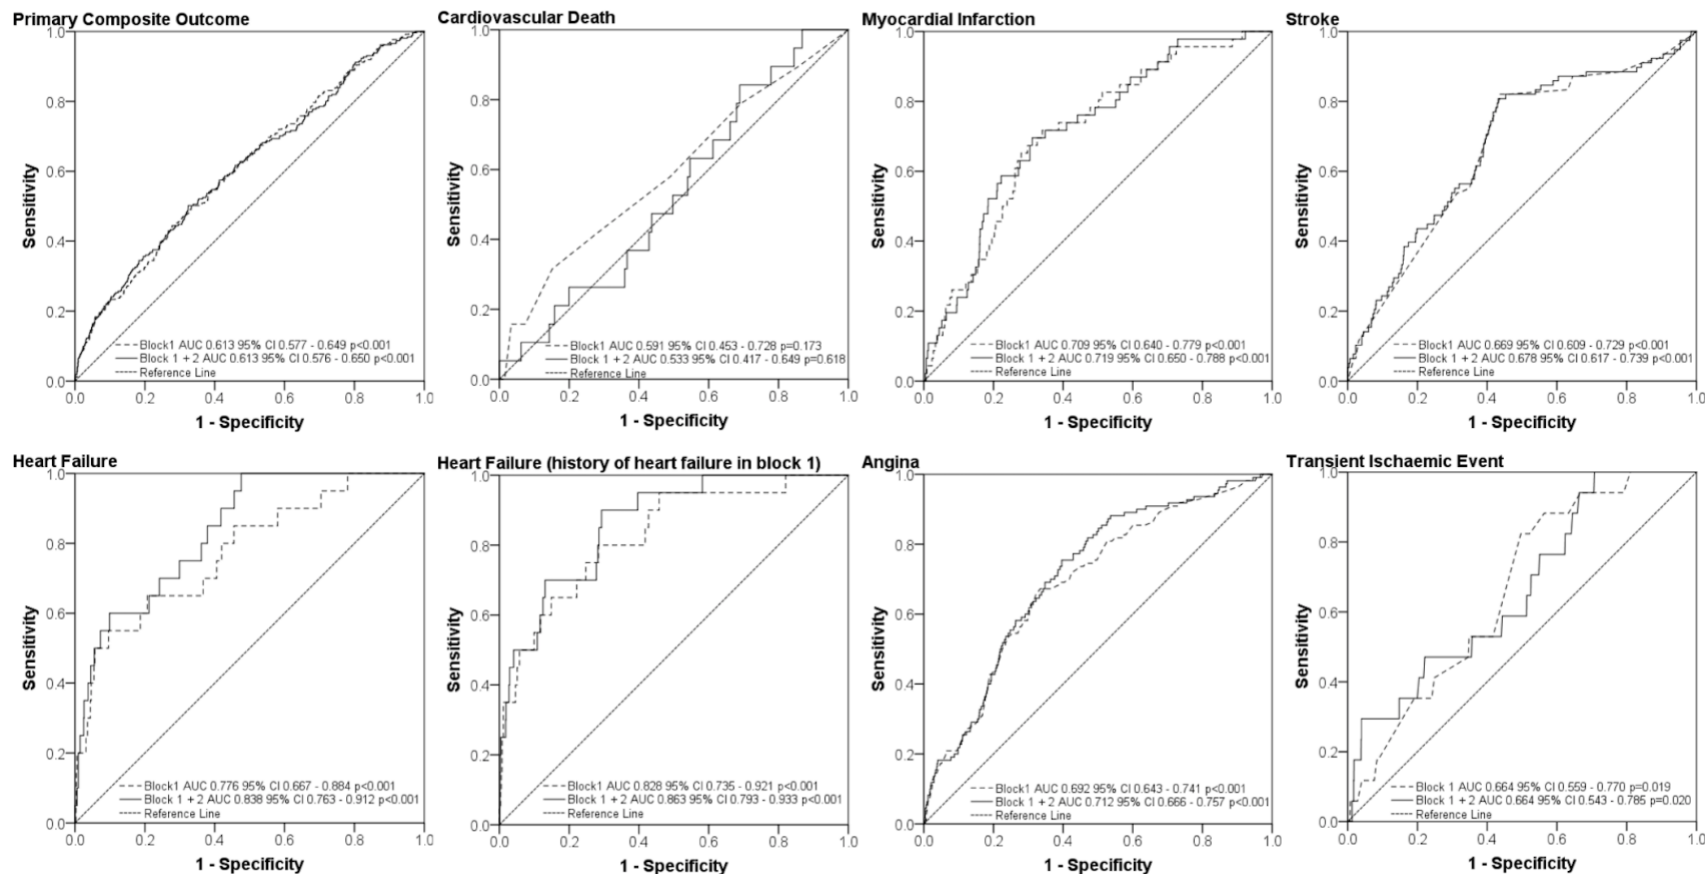

Receiver-Operator Characteristic Curves for two year outcomes in SAVE, with predictive equations from two block, backwards stepwise conditional multivariate Cox regression analyses. In each case, Block 1 was calculated using “standard” variables (treatment allocation, smoking status, ethnicity, hypertension history, diabetes status, cardiovascular disease history category, count of medications at baseline, age, waist:hip ratio, and oxygen desaturation index). Block 2 added novel metrics from pulse oximetry analyses (mean pulse rate and its standard deviation, baseline SpO<sub>2</sub>, and measures of identified desaturation events: desaturation/resaturation time ratio, average SpO<sub>2</sub> reduction and duration). Variables retained in the model were determined in each block by p(in) 0.05, p(out) 0.10.
